# Supplementary material for: Sirt1 AS lncRNA interacts with its mRNA to inhibit muscle formation by attenuating function of miR-34a
Source: PubMed Central journal article supplement (PMC4763196; doi:10.1038/srep21865), 2016-02-23
Supplement: srep21865-s1.pdf [file srep21865-s1.pdf]

***Sirt1* AS lncRNA interacts with its mRNA to inhibit muscle formation by attenuating function of**

**miR-34a**

Guo-qiang Wang #, Yu Wang #, Yan Xiong #, Xiao-Chang Chen, Mei-ling Ma, Rui Cai, Yun Gao, Yun-mei Sun, Gong-She Yang & Wei-Jun Pang \*

Laboratory of Animal Fat Deposition & Muscle Development, College of Animal Science and Technology,  
Northwest A&F University, Yangling Shaanxi 712100, China

**Running Title:** *Sirt1* AS lncRNA inhibits muscle formation

#These authors contributed equally to this work

\* **Correspondence:** Wei-Jun Pang Ph.D.

**Address:** No. 22 Xinong Road, Yangling, Shaanxi Province 712100, China

**Tel:** 86-29-87091017

**Fax:** 86-29-87092430

**E-mail:** pwj1226@nwsuaf.edu.cn

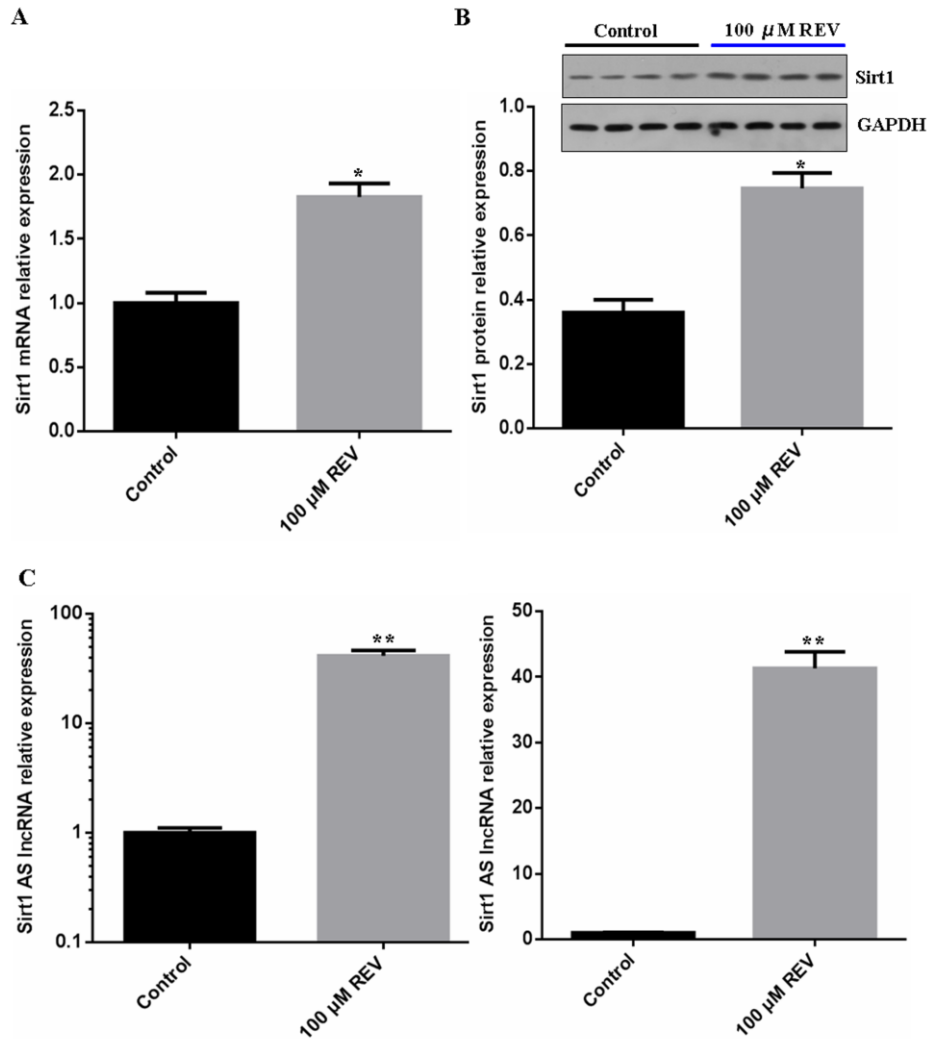

**Figure S1. Resveratrol upregulates *Sirt1AS* lncRNA in myoblasts.** C2C12 myoblasts were induced with 100μM resveratrol (REV; Sigma) according to the manufacturer's instructions when the cells reached 50-60% confluence after seeding in 6-well culture plates for 12 hours. Forty-eight hours post-induction, the cells were harvested and total RNA and protein were extracted for further strand-specific RT-PCR and western blot analysis. **(A)** Expression of *Sirt1* mRNA. **(B)** Expression of Sirt1 protein. **(C)** Expression of *Sirt1AS* lncRNA. The different histogram using log (left) and non-log (right) analysis in GraphPad Prism version 6. The data were presented as means  $\pm$ SEM of 4 to 6 independent experiments. \* $P < 0.05$  and \*\* $P < 0.01$ .

**Table S1.** Nucleotide sequences of the primers used for real-time quantitative PCR.

| Genes           | Direction | Primer sequence                |
|-----------------|-----------|--------------------------------|
| <i>Sirt1</i> AS | forward   | 5'-AATCCAGTCATTAACGGTCTACAA-3' |
|                 | reverse   | 5'-TAGGACCATTACTGCCAGAGG A-3'  |
| miR-34a         | forward   | 5'-CACGCATGGCAGTGTCTTAGC-3'    |
|                 | reverse   | 5'-CAGTGCAGGGTCCGAGGTA-3'      |
| <i>CyclinB</i>  | forward   | 5'-AACTTCAGCCTGGGTCG-3'        |
|                 | reverse   | 5'-CAGGGAGTCTTCACTGTAGGA-3'    |
| <i>CyclinD</i>  | forward   | 5'-TAGGCCCTCAGCCTCACTC-3'      |
|                 | reverse   | 5'-CCACCCCTGGGATAAAGCAC-3'     |
| <i>CyclinE</i>  | forward   | 5'-CAGAGCAGCGAGCAGGAGC-3'      |
|                 | reverse   | 5'-GCAGCTGCTTCCACACCACT-3'     |
| <i>MyoD</i>     | forward   | 5'-CGGCTCTCTCTGCTCCTTTG-3'     |
|                 | reverse   | 5'-GTCGAAACACGGGTCATCA-3'      |
| <i>MyoG</i>     | forward   | 5'-GACCCTACAGACGCCACAA-3'      |
|                 | reverse   | 5'-CCGTGATGCTGTCCACGAT-3'      |
| <i>MHC</i>      | forward   | 5'-CGCAAGAATGTTCTCAGGCT-3'     |
|                 | reverse   | 5'-GCCAGGTTGACATTGGATTG-3'     |
| <i>GAPDH</i>    | forward   | 5'-TGCTGAGTATGTCGTGGAGTCT-3'   |
|                 | reverse   | 5'-ATGCATTGCTGACAATCTTGAG-3'   |

**Table S2.** The primers used to construct plasmids for luciferase reporter assay.

| Genes               | Direction | Primer sequence                        |
|---------------------|-----------|----------------------------------------|
| <i>Sirt1</i> AS     | forward   | 5'-CGGGGTACCTATGCTATGAACAATGGAAG-3'    |
|                     | reverse   | 5'-CCGCTCGAGTTGCCTGTTGAGGATTTGGT-3'    |
| miR-34a             | forward   | 5'-CGGGGTACCCTGCTGTACCCTGCTGCTT-3'     |
|                     | reverse   | 5'-CCCAAGCTTTGGGCGTTGCTGACCTCT-3'      |
| <i>Sirt1</i> 3' UTR | forward   | 5'-CCGCTCGAG TTGCCTGTTGAGGATTTGGT-3'   |
|                     | reverse   | 5'-ATTTGCGGCCGCTATGCTATGAACAATGGAAG-3' |

**Table S3.** Sequence of oligonucleotides used for RPA.

| Genes                           | Direction | Primer sequence                | Product length, bp |
|---------------------------------|-----------|--------------------------------|--------------------|
| <i>Sirt1</i>                    | P1        | 5'-CTAGGTGGTGAATATGCCAAAC-3'   | 130                |
|                                 | P2        | 5'-TCCGAAATATGAAGAGGTGTTG-3'   |                    |
|                                 | P3        | 5'-GGTAGAGCCTGCATAGATCTT-3'    | 178                |
|                                 | P4        | 5'-ATTTATCTTATGACTTTGGGACTT-3' |                    |
| <i><math>\beta</math>-actin</i> | forward   | 5'-TGCTGTCCCTGTATGCCTCTG-3'    | 223                |
|                                 | reverse   | 5'-TTGATGTCACGCACGATTTC-3'     |                    |
